# Supplementary material
Source: publisher figshare collection journal article supplement (https://brill.figshare.com/articles/dataset/_/21354165)
Supplement: Supplementary file 1 [file 1]

## Sheet: Supplementary table S1
Table S1. Sampling details and sequences for the common midwife toad (Alytes obstetricans).
Haplotype code	Sample Names	Locality : Country	Latitude	Longitude
Ao_H1	DO02	Rhür valley : Germany	51.517	7.45
Ao_H1	JUB3	Jublains : France	48.251	-0.501
Ao_H1	NA37	Irati, Navarra : Spain	42.993	-1.1
Ao_H1	FRAN2	Jublains : France	48.251	-0.501
Ao_H1	FRAN3	Jublains : France	48.251	-0.501
Ao_H1	FRAN10	Saint-MichelFrance : France	43.046	-1.074
Ao_H1	PAM1	Irati, Navarra : Spain	42.993	-1.1
Ao_H1	FRAN14	St Pierre-de-la-Fage : France	43.794	3.42
Ao_H1	RAVON_33	Eckelrade : Netherlands	50.823	5.764
Ao_H1	RAVON_34	Eckelrade : Netherlands	50.823	5.764
Ao_H1	RAVON_35	Eckelrade : Netherlands	50.823	5.764
Ao_H1	RAVON_36	Eckelrade : Netherlands	50.823	5.764
Ao_H1	RAVON_59	Mheer : Netherlands	50.774	5.78
Ao_H1	RAVON_60	Mheer : Netherlands	50.774	5.78
Ao_H1	RAVON_69	Mheer : Netherlands	50.774	5.78
Ao_H1	RAVON_70	Mheer : Netherlands	50.774	5.78
Ao_H1	RAVON_74	Noordbeek : Netherlands	50.77	5.826
Ao_H1	RAVON_75	Noordbeek : Netherlands	50.77	5.826
Ao_H1	RAVON_79	Noordbeek : Netherlands	50.77	5.826
Ao_H1	RAVON_84	Noordbeek : Netherlands	50.77	5.826
Ao_H1	RAVON_113	Groeve Blom : Netherlands	50.857	5.792
Ao_H1	RAVON_114	Groeve Blom : Netherlands	50.857	5.792
Ao_H1	RAVON_115	Groeve Blom : Netherlands	50.857	5.792
Ao_H1	RAVON_116	Groeve Blom : Netherlands	50.857	5.792
Ao_H1	RAVON_126	Meertensgroeve : Netherlands	50.862	5.804
Ao_H1	RAVON_127	Meertensgroeve : Netherlands	50.862	5.804
Ao_H1	RAVON_128	Meertensgroeve : Netherlands	50.862	5.804
Ao_H1	RAVON_129	Meertensgroeve : Netherlands	50.862	5.804
Ao_H1	RAVON_136	Curfsgroeve : Netherlands	50.872	5.76
Ao_H1	RAVON_137	Curfsgroeve : Netherlands	50.872	5.76
Ao_H1	RAVON_138	Curfsgroeve : Netherlands	50.872	5.76
Ao_H1	RAVON_139	Curfsgroeve : Netherlands	50.872	5.76
Ao_H1	RAVON_146	Kloosterbosch-Meerssen : Netherlands	50.878	5.796
Ao_H1	RAVON_147	Kloosterbosch-Meerssen : Netherlands	50.878	5.796
Ao_H1	RAVON_148	Kloosterbosch-Meerssen : Netherlands	50.878	5.796
Ao_H1	RAVON_149	Kloosterbosch-Meerssen : Netherlands	50.878	5.796
Ao_H1	RAVON_171	Emmaberg : Netherlands	50.875	5.848
Ao_H1	RAVON_173	Emmaberg : Netherlands	50.875	5.848
Ao_H1	RAVON_174	Emmaberg : Netherlands	50.875	5.848
Ao_H1	RAVON_192	Schaelsberg : Netherlands	50.86	5.857
Ao_H1	RAVON_194	Schaelsberg : Netherlands	50.86	5.857
Ao_H1	RAVON_196	Bemelerberg : Netherlands	50.85	5.765
Ao_H1	RAVON_197	Bemelerberg : Netherlands	50.85	5.765
Ao_H1	RAVON_200	Bemelerberg : Netherlands	50.85	5.765
Ao_H1	RAVON_204	Bemelerberg : Netherlands	50.85	5.765
Ao_H1	RAVON_208	Groeve 't Rooth : Netherlands	50.838	5.775
Ao_H1	RAVON_212	Groeve 't Rooth : Netherlands	50.838	5.775
Ao_H1	RAVON_213	Groeve 't Rooth : Netherlands	50.838	5.775
Ao_H1	RAVON_215	Groeve 't Rooth : Netherlands	50.838	5.775
Ao_H1	RAVON_217	Groeve 't Rooth : Netherlands	50.838	5.775
Ao_H1	RAVON_220	Julianagroeve : Netherlands	50.832	5.778
Ao_H1	RAVON_221	Julianagroeve : Netherlands	50.832	5.778
Ao_H1	RAVON_224	Julianagroeve : Netherlands	50.832	5.778
Ao_H1	RAVON_228	Julianagroeve : Netherlands	50.832	5.778
Ao_H1	RAVON_232	Kruisbos : Netherlands	50.803	5.913
Ao_H1	RAVON_242	Kruisbos : Netherlands	50.803	5.913
Ao_H1	RAVON_243	Kruisbos : Netherlands	50.803	5.913
Ao_H1	RAVON_252	Kruisbos : Netherlands	50.803	5.913
Ao_H1	RAVON_262	Keverberg : Netherlands	50.852	5.972
Ao_H1	RAVON_265	Keverberg : Netherlands	50.852	5.972
Ao_H1	RAVON_268	Keverberg : Netherlands	50.852	5.972
Ao_H1	RAVON_270	Keverberg : Netherlands	50.852	5.972
Ao_H1	RAVON_272	Kunderberg : Netherlands	50.864	5.95
Ao_H1	RAVON_273	Kunderberg : Netherlands	50.864	5.95
Ao_H1	RAVON_274	Kunderberg : Netherlands	50.864	5.95
Ao_H1	RAVON_275	Kunderberg : Netherlands	50.864	5.95
Ao_H1	RAVON_282	Putberg : Netherlands	50.855	5.966
Ao_H1	RAVON_283	Putberg : Netherlands	50.855	5.966
Ao_H1	RAVON_284	Putberg : Netherlands	50.855	5.966
Ao_H1	RAVON_285	Putberg : Netherlands	50.855	5.966
Ao_H1	RAVON_287	Ubachsberg zuid : Netherlands	50.856	5.96
Ao_H1	RAVON_288	Ubachsberg zuid : Netherlands	50.856	5.96
Ao_H1	RAVON_289	Ubachsberg zuid : Netherlands	50.856	5.96
Ao_H1	RAVON_290	Ubachsberg zuid : Netherlands	50.856	5.96
Ao_H1	RAVON_292	Holset : Netherlands	50.775	5.988
Ao_H1	RAVON_293	Holset : Netherlands	50.775	5.988
Ao_H1	RAVON_298	Holset : Netherlands	50.775	5.988
Ao_H1	RAVON_307	Holset : Netherlands	50.775	5.988
Ao_H1	RAVON_501	Langenberg Goslar : Germany	51.903	10.508
Ao_H1	RAVON_502	Langenberg Goslar : Germany	51.903	10.508
Ao_H1	RAVON_503	Langenberg Goslar : Germany	51.903	10.508
Ao_H1	RAVON_504	Langenberg Goslar : Germany	51.903	10.508
Ao_H1	RAVON_506	Velbert : Germany	51.34	7.047
Ao_H1	RAVON_507	Velbert : Germany	51.34	7.047
Ao_H1	RAVON_508	Velbert : Germany	51.34	7.047
Ao_H1	RAVON_509	Velbert : Germany	51.34	7.047
Ao_H1	Swab_98	De Klip : Netherlands	52.157	4.379
Ao_H1	Swab_100	De Klip : Netherlands	52.157	4.379
Ao_H1	Swab_102	De Klip : Netherlands	52.157	4.379
Ao_H1	Swab_103	De Klip : Netherlands	52.157	4.379
Ao_H1	Swab_106	De Klip : Netherlands	52.157	4.379
Ao_H1	Swab_108	De Klip : Netherlands	52.157	4.379
Ao_H1	Swab_110	De Klip : Netherlands	52.157	4.379
Ao_H1	Swab_112	De Klip : Netherlands	52.157	4.379
Ao_H1	Swab_114	De Klip : Netherlands	52.157	4.379
Ao_H1	Swab_116	De Klip : Netherlands	52.157	4.379
Ao_H1	Swab_118	De Klip : Netherlands	52.157	4.379
Ao_H1	Swab_218	De Klip : Netherlands	52.157	4.378
Ao_H1	Swab_219	De Klip : Netherlands	52.157	4.378
Ao_H1	Swab_316	Den Haag : Netherlands	52.079	4.247
Ao_H1	Swab_319	Den Haag : Netherlands	52.079	4.247
Ao_H1	Swab_321	Den Haag : Netherlands	52.1	4.278
Ao_H1	RAVON_322	Groot-Loon : België	50.794	5.362
Ao_H1	RAVON_323	Groot-Loon : België	50.794	5.362
Ao_H1	Swab_324	Den Haag : Netherlands	52.1	4.284
Ao_H1	Swab_325	Den Haag : Netherlands	52.1	4.284
Ao_H1	RAVON_358	Voeren - Veurs : België	50.736	5.851
Ao_H1	RAVON_376	Voeren - Veurs : België	50.736	5.851
Ao_H1	RAVON_377	St_Genesius_Rode : België	50.732	4.362
Ao_H1	RAVON_378	St_Genesius_Rode : België	50.732	4.362
Ao_H1	RAVON_380	Terril_St_Antoine : België	50.413	3.772
Ao_H1	RAVON_381	Terril_St_Antoine : België	50.413	3.772
Ao_H1	RAVON_409	Grande_Honnelle : België	50.342	3.726
Ao_H1	RAVON_410	Grande_Honnelle : België	50.342	3.726
Ao_H1	RAVON_411	Camp_militaire_de_Marche_en_Famenne : België	50.29	5.371
Ao_H1	RAVON_412	Camp_militaire_de_Marche_en_Famenne : België	50.29	5.371
Ao_H1	RAVON_441	Carrière_de_Stockay : België	50.577	5.379
Ao_H1	RAVON_442	Carrière_de_Stockay : België	50.577	5.379
Ao_H1	RAVON_471	Carrière_de_Marchempré : België	50.476	5.022
Ao_H1	RAVON_351	Voeren - Kattenroth : België	50.757	5.802
Ao_H1	Swab_318	Den Haag : Netherlands	52.0792	4.24734
Ao_H1	Swab_323	Den Haag : Netherlands	52.0996	4.27879
Ao_H2	MGP115	Tolivia, Asturias : Spain	43.2	-5.583
Ao_H2	RIB1	El Fito : Spain	43.433	-5.148
Ao_H2	MNCN:DNA:4785	Somiedo : Spain	43.07	-6.306
Ao_H3	OUR03	Penalba : Spain	43.425	-7.733
Ao_H4	PO01	Monte Aloia : Spain	42.05	-8.633
Ao_H4	VAL22	Alfena : Portugal	41.24	-8.525
Ao_H4	LUG1	Fontaneira : Spain	43.034	-7.2
Ao_H4	LUG2	Fontaneira : Spain	43.034	-7.2
Ao_H4	VER1	Castrelo del Valle : Spain	41.983	-7.417
Ao_H4	VER2	Castrelo del Valle : Spain	41.983	-7.417
Ao_H4	VPA9	Cerva : Portugal	41.467	-7.833
Ao_H4	VPA13	Cerva : Portugal	41.467	-7.833
Ao_H4	MUR1	Jou : Portugal	41.483	-7.433
Ao_H4	VAL24	Alfena : Portugal	41.24	-8.525
Ao_H4	IMS3624	Monte Aloia : Spain	42.05	-8.633
Ao_H4	IMS3625	Monte Aloia : Spain	42.05	-8.633
Ao_H4	IMS3626	Monte Aloia : Spain	42.05	-8.633
Ao_H4	IMS3627	Monte Aloia : Spain	42.05	-8.633
Ao_H4	IMS3628	Monte Aloia : Spain	42.05	-8.633
Ao_H4	MNCN:DNA:8590	Monte Aloia : Spain	42.05	-8.633
Ao_H5	ZA04	Valdefinjas : Spain	41.451	-5.451
Ao_H5	IMS2669	Circo del Nevero : Madrid	40.979	-3.844
Ao_H5	IMS2670	Circo del Nevero : Madrid	40.979	-3.844
Ao_H5	IMS4301	Vegas de Matute : Spain	40.801	-4.258
Ao_H5	IMS4302	Vegas de Matute : Spain	40.801	-4.258
Ao_H 6	HG120	Belmonte de Tajo : Madrid	40.133	-3.339
Ao_H7	HG123	Buenache de la Sierra, Cuenca : Spain	40.134	-2
Ao_H8	HG076	Puerto Nuevo : Spain	40.361	-6.536
Ao_H8	MTM01	Cinfães : Portugal	41.078	-8.024
Ao_H8	GAT2	Puerto Nuevo : Spain	40.361	-6.536
Ao_H8	MAL5	Serra da Malcata : Portugal	40.306	-7.078
Ao_H8	EST26	Serra da Estrela : Portugal	40.333	-7.617
Ao_H8	IMS1460	Coimba a Miranda do Corvo : Portugal	40.111	-8.379
Ao_H8	IMS1461	Coimba a Miranda do Corvo : Portugal	40.111	-8.379
Ao_H8	IMS2928	Cabezuela del Valle : Spain	40.211	-5.778
Ao_H8	IMS3640	Navarredonda de Gredos : Spain	40.33	-5.116
Ao_H8	MTM05	Serra de Montemuro : Portugal	41.078	-8.024
Ao_H9	SMA25	Rib. S. Bento : Portugal	39.317	-7.417
Ao_H10	HS16	Ibón de Piedrafita : Spain	42.7	-0.333
Ao_H10	HUE2	Ibón de Piedrafita : Spain	42.7	-0.333
Ao_H10	IMS2501	Naval : Spain	42.188	0.154
Ao_H10	IMS2502	Naval : Spain	42.188	0.154
Ao_H11	BR03	Rasos de Peguera : Spain	42.136	1.761
Ao_H11	BER10	Llinars : Spain	42.131	1.709
Ao_H12	BR13	Rasos de Peguera : Spain	42.136	1.761
Ao_H13	CAT10	Rasos de Peguera : Spain	42.136	1.761
Ao_H13	BER5	Llinars : Spain	42.131	1.709
Ao_H13	BER7	Llinars : Spain	42.131	1.709
Ao_H14	CAT12	Llinars : Spain	42.131	1.709
Ao_H15	ALI1	El Pinoso : Spain	38.4	-1.033
Ao_H15	ALI2	El Pinoso : Spain	38.4	-1.033
Ao_H15	IMS1901	Enguera : Spain	38.929	-0.855
Ao_H15	IMS1902	Enguera : Spain	38.929	-0.855
Ao_H15	IMS1932	Mas de Celedons : Spain	38.669	-0.525
Ao_H15	IMS1933	Mas de Celedons : Spain	38.669	-0.525
Ao_H16	GUA1	Sierra de Guadarrama : Spain	40.824	-3.962
Ao_H16	GUA2	Sierra de Guadarrama : Spain	40.824	-3.962
Ao_H16	TUD1	Tudanca : Spain	43.15	-4.367
Ao_H16	IMS2749	Valsaín : Spain	40.804	-4.023
Ao_H16	IMS2750	Valsaín : Spain	40.804	-4.023
Ao_H16	IMS3022	Canamares : Spain	41.227	-2.956
Ao_H16	IMS3244	Valdefinjas : Spain	41.451	-5.451
Ao_H16	IMS3245	Valdefinjas : Spain	41.451	-5.451
Ao_H16	IMS3866	Arnedo : Spain	42.224	-2.076
Ao_H16	IMS4055	Villaverde de Montejo : Spain	41.504	-3.666
Ao_H17	MAD1	Colmenar de Oreja : Spain	40.108	-3.387
Ao_H18	MAD2	Valdelaguna : Spain	40.162	-3.368
Ao_H18	MAD3	Valdelaguna : Spain	40.162	-3.368
Ao_H18	ZAM1	Valdefinjas : Spain	41.451	-5.451
Ao_H18	OLV1	Ólvega : Spain	41.781	-1.985
Ao_H18	TOL1	La Guardia : Spain	39.783	-3.483
Ao_H18	TOL2	La Guardia : Spain	39.783	-3.483
Ao_H18	ALB2	Higueruela : Spain	38.95	-1.45
Ao_H18	IMS1851	Las Fuentes : Spain	39.003	-1.304
Ao_H18	IMS2021	Alcublas : Spain	39.815	-0.7
Ao_H18	IMS2022	Alcublas : Spain	39.815	-0.7
Ao_H18	IMS2071	Barranc dels Horts : Spain	40.414	-0.066
Ao_H18	IMS2072	Barranc dels Horts : Spain	40.414	-0.066
Ao_H18	IMS2091	Cantavieja : Spain	40.516	-0.459
Ao_H18	IMS2126	Corbalán : Spain	40.406	-0.986
Ao_H18	IMS2127	Corbalán : Spain	40.406	-0.986
Ao_H18	IMS2267	Moros : Spain	41.402	-1.82
Ao_H18	IMS2268	Moros : Spain	41.402	-1.82
Ao_H18	IMS2300	Belchite : Spain	41.285	-0.776
Ao_H18	IMS2314	Caspe : Spain	41.148	0.013
Ao_H18	IMS2315	Caspe : Spain	41.148	0.013
Ao_H18	IMS2318	Mazaleón : Spain	41.061	0.11
Ao_H18	IMS2338	El Perelló : Spain	40.858	0.67
Ao_H18	IMS2368	Riudoms : Spain	41.148	1.043
Ao_H18	IMS2522	Hayedo de Tejera Negra : Spain	41.237	-3.35
Ao_H18	IMS2621	Gárgoles : Spain	40.757	-2.631
Ao_H18	IMS2641	Frías de Albarracín : Spain	40.362	-1.615
Ao_H18	IMS2642	Frías de Albarracín : Spain	40.362	-1.615
Ao_H18	IMS2645	Guadalaviar : Spain	40.395	-1.728
Ao_H18	IMS2646	Guadalaviar : Spain	40.395	-1.728
Ao_H18	IMS2665	Terzaga a Peralejos de las Truchas : Spain	40.647	-1.907
Ao_H18	IMS2666	Terzaga a Peralejos de las Truchas : Spain	40.647	-1.907
Ao_H18	IMS4358	Mirabueno : Spain	40.948	-2.729
Ao_H18	IMS4359	Mirabueno : Spain	40.948	-2.729
Ao_H19	GLJ1	Ciruelas : Spain	40.752	-3.09
Ao_H20	GLJ2	Torija : Spain	40.744	-3.03
Ao_H21	GLJ3	Torija : Spain	40.744	-3.03
Ao_H21	IMS2248	Montuenga : Spain	41.225	-2.21
Ao_H22	SOR1	Vinuesa : Spain	41.912	-2.763
Ao_H23	CAC1	Arroyo San Blas : Spain	40.233	-6.6
Ao_H23	IMS2538	Valdaracete : Spain	40.16	-3.179
Ao_H24	ALB1	Higueruela : Spain	38.95	-1.45
Ao_H25	VLC1	Algar de Palancia : Spain	39.782	-0.367
Ao_H26	VLC2	Algar de Palancia : Spain	39.782	-0.367
Ao_H27	CAS1	Barranco de Santa Agueda : Spain	40.05	0.066
Ao_H28	CAS2	Barranco de Santa Agueda : Spain	40.05	0.066
Ao_H28	IMS1852	Las Fuentes : Spain	39.003	-1.304
Ao_H28	IMS2299	Belchite : Spain	41.285	-0.776
Ao_H28	IMS2317	Mazaleón : Spain	41.061	0.11
Ao_H28	IMS2634	Albarracín : Spain	40.362	-1.615
Ao_H28	IMS2643	Nacimiento río Tajo : Spain	40.321	-1.698
Ao_H28	IMS2644	Nacimiento río Tajo : Spain	40.321	-1.697
Ao_H29	MON1	Refega : Portugal	41.783	-6.583
Ao_H29	MON15	Refega : Portugal	41.783	-6.583
Ao_H29	MOG5	Mogadouro : Portugal	41.333	-6.717
Ao_H29	MOG6	Mogadouro : Portugal	41.333	-6.717
Ao_H29	IMS3507	Feces de Abaixo : Portugal	41.81	-7.422
Ao_H30	MON12	Refega : Portugal	41.783	-6.583
Ao_H31	MIR1	Mirandela : Portugal	41.483	-7.167
Ao_H32	IMS2006	Las Nogueras : Spain	39.588	-1.082
Ao_H32	IMS2007	Las Nogueras : Spain	39.588	-1.082
Ao_H32	IMS2633	Albarracín : Spain	40.362	-1.615
Ao_H33	IMS2092	Cantavieja : Spain	40.516	-0.459
Ao_H34	IMS2247	Montuenga : Spain	41.225	-2.21
Ao_H35	IMS2288	Tobed : Spain	41.34	-1.399
Ao_H35	IMS2289	Tobed : Spain	41.34	-1.399
Ao_H36	IMS2337	El Perelló : Spain	40.858	0.67
Ao_H37	IMS2367	Riudoms : Spain	41.148	1.043
Ao_H38	IMS2387	El Port D'Armentera : Spain	41.387	1.359
Ao_H39	IMS2571	Canredondo : Spain	40.784	-2.544
Ao_H39	IMS2572	Canredondo : Spain	40.784	-2.544
Ao_H39	IMS2620	Gárgoles : Spain	40.757	-2.631
Ao_H40	SAN1	Fresnedo : Spain	43.367	-3.567
Ao_H40	IMS3009	P. N. Gorbeia : Spain	43.088	-2.792
Ao_H40	IMS3010	P. N. Gorbeia : Spain	43.088	-2.792
Ao_H41	SAN2	Fresnedo : Spain	43.367	-3.567
Ao_H42	SAN3	Fresnedo : Spain	43.367	-3.567
Ao_H42	IMS4096	Ribaforada : Spain	42.006	-1.536
Ao_H43	SAN4	Fresnedo : Spain	43.367	-3.567
Ao_H43	LEO3	Veguellina de Órbigo : Spain	42.45	-5.885
Ao_H43	MNCN:DNA:4786	Somiedo : Spain	43.07	-6.306
Ao_H43	MNCN:DNA:8444	Lago de Isoba : Spain	43.046	-5.314
Ao_H44	TUD2	Tudanca : Spain	43.15	-4.367
Ao_H44	TUD3	Tudanca : Spain	43.15	-4.367
Ao_H44	IMS3621	Casavegas : Spain	43.022	-4.513
Ao_H45	TUD4	Tudanca : Spain	43.15	-4.367
Ao_H46	OVI1	Puerto de San Isidro : Spain	43.05	-5.325
Ao_H46	LEO1	Lago de Isoba : Spain	43.046	-5.314
Ao_H47	TIN1	Tineo : Spain	43.333	-6.417
Ao_H48	COR2	Arteixo : Spain	43.375	-8.433
Ao_H48	IMS2630	Alfonxe : Spain	42.924	-7.389
Ao_H49	LEO2	Lago de Isoba : Spain	43.046	-5.314
Ao_H50	IMS2631	Alfonxe : Spain	42.924	-7.389
Ao_H51	MNCN:DNA:4445	Sierra de Andía : Spain	42.818	-1.97
Ao_H52	IMS3959	Iraty Lake : France	43.046	-1.074
Ao_H53	COR1	Arteixo : Spain	43.375	-8.433
Ao_H54	OUR2	Penalba : Spain	43.425	-7.733
Ao_H55	GER1	Carris : Portugal	41.817	-8.05
Ao_H56	GER2	Carris : Portugal	41.817	-8.05
Ao_H57	LOU2	Lousada : Portugal	41.303	-8.253
Ao_H58	LOU6	Lousada : Portugal	41.303	-8.253
Ao_H59	MTM2	Cinfaes : Portugal	41.078	-8.024
Ao_H60	VOU11	Rio Mau : Portugal	40.733	-8.4
Ao_H61	MAN1	Freixiosa : Portugal	40.6	-7.683
Ao_H62	MAL4	Serra da Malcata : Portugal	40.306	-7.078
Ao_H63	EST27	Serra da Estrela : Portugal	40.333	-7.617
Ao_H64	SMA26	Rib. S. Bento : Portugal	39.317	-7.417
Ao_H65	FCO2	Penedono : Portugal	40.983	-7.4
Ao_H66	BEN1	Fonchanina : Spain	42.522	0.652
Ao_H66	BER19	Soldes : Spain	42.35	1.7
Ao_H66	IMS2407	Piera : Spain	41.511	1.737
Ao_H66	IMS2428	Sant Miquel del Fai : Spain	41.716	2.193
Ao_H67	BER2	Rasos de Peguera : Spain	42.136	1.761
Ao_H67	IMS2427	Sant Miquel del Fai : Spain	41.716	2.193
Ao_H67	IMS2467	La Bisbal : Spain	41.939	2.949
Ao_H67	IMS2468	La Bisbal : Spain	41.939	2.949
Ao_H67	MNCN:DNA:4334	Riudarenes : Spain	41.822	2.717
Ao_H68	BER8	Rasos de Peguera : Spain	42.136	1.761
Ao_H68	BER9	Rasos de Peguera : Spain	42.136	1.761
Ao_H68	BER11	Llinars : Spain	42.131	1.709
Ao_H68	BER12	Llinars : Spain	42.131	1.709
Ao_H68	BER13	Llinars : Spain	42.131	1.709
Ao_H68	BER16	Llinars : Spain	42.131	1.709
Ao_H68	BER18	Llinars : Spain	42.131	1.709
Ao_H68	BER20	La Coma : Spain	42.188	1.581
Ao_H68	BER21	La Coma : Spain	42.188	1.581
Ao_H68	BER22	La Coma : Spain	42.188	1.581
Ao_H68	BER23	La Coma : Spain	42.188	1.581
Ao_H68	IMS2388	El Port D'Armentera : Spain	41.387	1.359
Ao_H68	IMS2408	Piera : Spain	41.511	1.737
Ao_H68	IMS2448	Sant Hilari Sacalm : Spain	41.903	2.506
Ao_H68	IMS2492	Prades : Spain	41.795	1.579
Ao_H68	IMS2493	Prades : Spain	41.795	1.579
Ao_H68	IMS4107	Tuchan : France	42.885	2.733
Ao_H69	IMS2447	Sant Hilari Sacalm : Spain	41.903	2.506
Ao_H70	RAVON_1	ENCI-groeve : Netherlands	50.828	5.683
Ao_H70	RAVON_2	ENCI-groeve : Netherlands	50.828	5.683
Ao_H70	RAVON_4	ENCI-groeve : Netherlands	50.828	5.683
Ao_H70	RAVON_5	ENCI-groeve : Netherlands	50.828	5.683
Ao_H70	RAVON_9	ENCI-groeve : Netherlands	50.828	5.683
Ao_H70	RAVON_10	ENCI-groeve : Netherlands	50.828	5.683
Ao_H70	RAVON_11	ENCI-groeve : Netherlands	50.828	5.683
Ao_H70	RAVON_12	ENCI-groeve : Netherlands	50.828	5.683
Ao_H70	RAVON_13	ENCI-groeve : Netherlands	50.828	5.683
Ao_H71	RAVON_88	Gerendal : Netherlands	50.842	5.855
Ao_H71	RAVON_89	Gerendal : Netherlands	50.842	5.855
Ao_H71	RAVON_106	Gerendal : Netherlands	50.842	5.855
Ao_H71	RAVON_107	Gerendal : Netherlands	50.842	5.855
Ao_H72	RAVON_172	Emmaberg : Netherlands	50.875	5.848
Ao_H73	RAVON_191	Schaelsberg : Netherlands	50.86	5.857
Ao_H73	RAVON_193	Schaelsberg : Netherlands	50.86	5.857
Ao_H74	Swab_317	Den Haag : Netherlands	52.0792	4.24734
Ao_H74	Swab_320	Den Haag : Netherlands	52.0792	4.24734
Note that, for conservation purposes, coordinates of newly sequenced localities have been ommitted.
Haplotype code	Number of sequences	Sequence
Ao_H1	95	CCTGAAGTTTTTCAGGAGCTATTGTTCTAATAATTGCACATGGACTAATCTCATCCGCTCTATTTTGCCTAGCCAACACCAACTACGAACGAACCCACAGCCGAGCACTACTCCTCTCCCGAGGGATACAAACAGTATTACCACTGATAGGCTCATGATGACTTCTAGCAAACCTCGCTAATATGGCTCTCCCCCCCTCCCCCAACCTCATAGGGGAGATTACCATTATAACTGCTATATTTAACTGATCAAACTGATCCCTAATTCTCACAGGCCTGGGCACCCTCCTCACTGCTTGCTACTCCCTATACATATTCCTTATGACGCAACGAGGGCTAACACCCCAACATCTCACAACCATTTACCCCTCACACACTCGAGAGCACACACTCATCGCCC…
Ao_H2	3	CCTGAAGTTTTTCAGGAGCTATTGTTCTAATAATTGCACATGGACTAATCTCATCCGCTCTATTTTGCCTAGCCAACACCAACTACGAACGAACCCACAGCCGAGCACTACTCCTCTCCCGAGGGATACAAACAGTATTACCACTGATAGGCTCATGATGACTTCTAGCAAACCTCGCTAATATGGCTCTCCCCCCCTCCCCCAACCTCATAGGGGAGATTACCATTATAACTGCTATATTTAACTGATCAAACTGATCCCTGATTCTCACAGGCCTAGGCACCCTCCTCACTGCTTGCTACTCCCTATACATATTCCTTATAACGCAACGAGGACTAACACCCCAACATCTCACAACCATTTACCCCTCACACACTCGAGAGCACACACTCATCGCCC…
Ao_H3	1	CCTGAAGTTTTTCAGGAGCTATTGTTCTAATAATTGCTCATGGACTAATCTCATCCGCTCTATTTTGCCTAGCCAACACCAACTACGAACGAACCCACAGCCGAGCACTACTCCTCTCCCAAGGGATACAAACAGTATTACCACTGATAGGCTCATGATGACTTCTAGCAAACCTCGCTAATATGGCTCTCCCCCCCTCCCCCAACCTCATAGGGGAGATTACCATTATAACTGCTATATTTAACTGATCAAACTGATCCCTGATTCTCACAGGCCTGGGCACCCTTCTCACTGCTTGCTACTCCCTATATATGTTCCTTATGACCCAACGAGGACAAACACCCCAACATCTCACAACCATTTACCCCTCACACACTCGAGAGCACACACTCATCGCCC…
Ao_H4	16	CCTGAAGTTTTTCAGGAGCTATTGTTCTAATAATTGCTCATGGACTAATCTCATCCGCTCTATTTTGCCTAGCCAACACCAACTACGAACGAACCCACAGCCGAGCACTACTCCTCTCCCGAGGGATACAAACAGTATTACCACTGATAGGCTCATGATGACTTCTAGCAAACCTCGCTAATATGGCTCTCCCCCCCTCCCCCAACCTCATAGGGGAGATTACCATTATAACTGCTATATTTAACTGATCAAACTGATCCCTGATTCTCACAGGCCTGGGCACCCTTCTCACTGCTTGCTACTCCCTATATATGTTCCTTATGACGCAACGAGGACAAACACCCCAACATCTCACAACCATTTACCCCTCACACACTCGAGAGCACACACTCATCGCCC…
Ao_H5	5	CCTGAAGTTTTTCAGGAGCTATTGTTCTAATAATTGCACATGGACTAATCTCATCCGCTCTATTTTGCCTAGCCAACACCAACTACGAACGAACCCACAGCCGAGCACTACTCCTCTCCCGAGGGATACAAACAGTATTACCACTGATAGGCTCATGATGACTTCTGGCAAACCTCGCTAATATGGCTCTCCCCCCCTCCCCCAACCTCATGGGGGAGATTACCATTATAACTGCTATATTTAACTGATCAAACTGATCCCTGGTTCTCACAGGCCTGGGCACCCTCCTCACTGCTTGCTACTCCCTATATATATTCCTTATAACACAACGAGGAATAACACCCCAACATCTCACAACCATTTACCCCTCACACACTCGAGAGCACACACTCATCGCCC…
Ao_H6	1	CCTGAAGTTTTTCAGGAGCTATTGTTCTAATAATTGCACACGGACTAATCTCATCCGCTCTATTTTGCCTAGCCAACACCAACTACGAACGAACCCACAGCCGAGCACTACTCCTCTCCCGAGGGATACAAACAGTATTACCACTGATAGGCTCATGATGACTTCTAGCAAACCTCGCTAATATGGCTCTCCCCCCCTCCCCCAACCTCATGGGGGAGATTACCATTATAACTGCTATATTTAATTGATCAAACTGATCCCTGGTTCTCACAGGCCTGGGCACCCTCCTCACTGCTTGGTACTCCCTATATATATTCCTTATAACACAACGAGGACTAACACCCCAACATCTCACAACCATTTATCCCTCACACACTCGAGAGCACACACTCATCGCCC…
Ao_H7	1	CCTGAAGTTTTTCAGGAGCTATTGTTCTAATAATTGCACATGGACTAATCTCATCCGCTCTATTTTGCCTAGCCAACACCAACTACGAACGAACCCACAGCCGAGCACTACTCCTCTCCCGAGGGATACAAACAGTATTACCACTGATGGGCTCATGATGACTTCTAGCAAACCTCGCTAATATGGCTCTCCCCCCCTCCCCCAACCTCATGGGGGAGATTACCATTATAACTGCTATATTTAACTGATCAAACTGATCCCTGGTTCTCACAGGCCTGGGCACCCTCCTCACTGCTTGCTACTCCCTATATATATTCCTTATAACACAACGAGGACTAACACCCCAACATCTCACAACCATTTACCCCTCACACACTCGAGAGCACACACTCATCGCCC…
Ao_H8	10	CCTGAAGTTTTTCAGGGGCTATTGTTCTAATAATTGCACATGGACTAGTCTCATCCGCTCTATTCTGCCTAGCTAACACCAACTACGAACGAACATACAGCCGAGCTCTACTCCTCTCCCGAGGAATACAAACAGTATTACCACTGATAGGCTCATGATGACTTCTAGCGAACCTCGCTAATATAGCTCTCCCCCCTTCCCCCAACCTCATAGGGGAAATTACCATCATAACTGCTATATTTAACTGATCAAACTGATCCCTGATCCTCACAGGCCTGGGCACCCTCCTCACTGCTTGCTACTCCCTATATATATTTCTTATAACACAACGAGGATTAACACCCCAACATCTCACAACCATTTACCCCTCACACACCCGAGAACACACACTCATCGCCC…
Ao_H9	1	CCTGAAGTTTTTCAGGGGCTATTGTTCTAATAATTGCACATGGACTAGTCTCATCCGCTCTATTCTGCCTAGCTAACACCAACTACGAACGAACATACAGCCGAGCTCTACTCCTCTCCCGAGGAATACAAACAGTATTACCACTGATAGGCTCATGATGACTTCTAGCGAACCTCGCTAATATAGCTCTCCCCCCTTCCCCCAACCTCATAGGGGAAATTACCATCATAACTGCTATATTTAACTGATCAAACTGATCCCTGATCCTCACAGGCCTGGGCACCCTCCTCACTGCTTGCTACTCCCTATATATATTCCTTATAACACAACGAGGTTTAACACCCCAACATCTCACAACCATTTACCCCTCACACACCCGAGAACACACACTCATCGCCC…
Ao_H10	4	CCTGAAGTTTTTCAGGCGCTATTGTTCTAATAATTGCACATGGACTAATCTCATCCGCTCTATTTTGCCTGGCCAACACCAACTACGAACGAACCCACAGCCGGGCACTACTCCTCTCCCGAGGAATACAAACAGTATTACCACTGATAGGCTCATGGTGACTTCTAACAAACCTCGCTAATATAGCTCTCCCCCCTTCCCCCAACCTCATAGGGGAAATTACCATTATAACTGCTATATTCAACTGATCAAACTGATCCCTAATTCTCACAGGCCTAGGCACCCTCCTCACTGCTTGCTACTCCCTATATATATTCCTTATAACACAACGAGGACTAACACCCCAACATCTCACAACCATTTACCCCTCACACACCCGAGAGCACACACTCATCGCCC…
Ao_H11	2	CCTGAAGTTTTTCAGGAGCTATTGTTCTAATAATTGCACATGGACTAATCTCATCCGCTCTATTTTGCCTAGCCAATACCAACTACGAACGAACCCACAGCCGAGCATTACTCCTCTCCCGAGGAATACAAACAGTACTACCACTGATAGGCTCATGATGACTTCTGGCAAACCTCGCTAATATGGCTCTCCCCCCCTCCCCCAACCTCATAGGGGAGATTACCATTATAACTGCCATATTTAACTGATCAAACTGATCCCTGATTCTCACAGGCCTGGGCACTCTCCTCACTGCTTGCTACTCCCTATATATATTCCTTATGACACAACGAGGACTAACACCCCAGCATCTCACAACCATTTACCCCTCACACACCCGAGAGCACACACTCATCGCCC…
Ao_H12	1	CCTGAAGTTTTTCAGGAGCTATTGTTCTAATAATTGCACATGGACTAATCTCATCCGCTCTATTTTGCCTAGCCAATACCAACTACGAACGAACCCACAGCCGAGCATTACTCCTCTCCCGAGGAATACAAACAGTACTACCACTGATAGGCTCATGATGACTTCTGGCAAACCTCGCTAATATAGCTCTCCCCCCTTCCCCCAACCTCATAGGGGAGATTACCATTATAACTGCCATATTTAACTGATCAAACTGATCCCTGATTCTCACAGGCCTGGGCACTCTCCTCACTGCTTGCTACTCCCTATATATATTCCTTATGACACAACGAGGACTAACACCCCAACATCTCACAACCATTTACCCCTCACACACCCGAGAGCACACACTCATCGCCC…
Ao_H13	3	CCTGAAGTTTTTCAGGAGCTATTGTTCTAATAATTGCACACGGACTAATCTCATCCGCTCTATTTTGCCTAGCCAATACCAACTACGAACGAACCCACAGCCGAGCATTACTCCTCTCCCGAGGAATACAAACAGTACTACCACTGATAGGCTCATGATGACTTCTGGCAAACCTCGCTAATATAGCTCTCCCCCCTTCCCCCAACCTCATAGGGGAGATTACCATTATAACTGCCATATTTAACTGATCAAACTGATCCCTGATTCTCACAGGCCTGGGCACTCTCCTCACTGCTTGCTACTCCCTATATATATTCCTTATGACACAACGAGGACTAACACCCCAGCATCTCACAACCATTTACCCCTCACACACCCGAGAGCACACACTCATCGCCC…
Ao_H14	1	CCTGAAGTTTTTCAGGAGCTATTATTCTAATAATTGCACATGGACTAATCTCATCCGCTCTATTTTGCCTAGCCAATACCAACTACGAACGAACCCACAGCCGAGCATTACTCCTCTCCCGAGGAATACAAACAGTACTACCACTGATAGGCTCATGATGACTTCTGGCAAACCTCGCTAATATAGCTCTCCCCCCCTCCCCCAACCTCATAGGGGAGATTACCATTATAACTGCCATATTTAACTGATCAAACTGATCCCTGATTCTCACAGGCCTGGGCACTCTCCTCACTGCTTGCTACTCCCTATATATATTCCTTATGACACAACGAGGACTAACACCCCAGCATCTCACAACCATTTACCCCTCACACACCCGAGAGCACACACTCATCGCCC…
Ao_H15	6	CCTGAAGTTTTTCAGGAGCTATTGTTCTAATAATTGCACATGGACTAATCTCATCCGCTCTATTTTGCCTAGCCAACACCAACTACGAACGAACCCACAGCCGAGCACTACTCCTCTCCCGAGGGATACAAACAGTATTACCACTGATAGGCTCATGATGACTTCTAGCAAACCTCGCTAATATGGCTCTCCCCCCCTCCCCCAACCTCATGGGGGAGATTACCATTATAACTGCTATATTTAACTGATCAAACTGATCCCTGGTTCTCACAGGCCTGGGCACCCTCCTCACTGCTTGCTACTCCCTATATATATTCCTTATAACACAACGAGGAATAACACCCCAACATCTCACAACCATTTACCCCTCACACACTCGAGAGCACACACTCATCGCCC…
Ao_H16	10	CCTGAAGTTTTTCAGGAGCTATTGTTCTAATAATTGCACATGGACTAATCTCATCCGCTCTATTTTGCCTAGCCAACACCAACTACGAACGAACCCACAGCCGAGCACTACTCCTCTCCCGAGGGATACAAACAGTATTACCACTGATAGGCTCATGATGACTTCTAGCAAACCTCGCTAATATGGCTCTCCCCCCCTCCCCCAACCTCATGGGGGAGATTACCATTATAACTGCTATATTTAACTGATCAAACTGATCCCTGGTTCTCACAGGCCTGGGCACCCTCCTCACTGCTTGCTACTCCCTATATATATTCCTTATAACACAACGAGGAATAACACCCCAACATCTCACAACCATTTACCCCTCACACACTCGAGAGCACACACTCATCGCCC…
Ao_H17	1	CCTGAAGTTTTTCAGGAGCTATTGTTCTAATAATTGCACACGGACTAATCTCATCCGCTCTATTTTGCCTAGCCAACACCAACTACGAACGAACCCACAGCCGAGCACTACTCCTCTCCCGAGGGATACAAACAGTATTACCACTGATAGGCTCATGATGACTTCTAGCAAACCTCGCTAATATGGGTCTCCCCCCCTCCCCCAACCTCATGGGGGAGATTACCATTATAACTGCTATATTTAATTGATCAAACTGATCCCTGGTTCTCACAGGCCTGGGCACCCTCCTCACTGCTTGCTACTCCCTATATATATTCCTTATAACACAACGAGGACTAACACCCCAACATCTCACAACCATTTATCCCTCACACACTCGAGAGCACACACTCATCGCCC…
Ao_H18	33	CCTGAAGTTTTTCAGGAGCTATTGTTCTAATAATTGCACATGGACTAATCTCATCCGCTCTATTTTGCCTAGCCAACACCAACTACGAACGAACCCACAGCCGAGCACTACTCCTCTCCCGAGGGATACAAACAGTATTACCACTGATAGGCTCATGATGACTTCTAGCAAACCTCGCTAATATGGCTCTCCCCCCCTCCCCCAACCTCATGGGGGAGATTACCATTATAACTGCTATATTTAACTGATCAAACTGATCCCTGGTTCTCACAGGCCTGGGCACCCTCCTCACTGCTTGCTACTCCCTATATATATTCCTTATAACACAACGAGGACTAACACCCCAACATCTCACAACCATTTACCCCTCACACACTCGAGAGCACACACTCATCGCCC…
Ao_H19	1	CCTGAAGTTTTTCAGGAGCTATTGTTCTAATAATTGCACATGGACTAATCTCATCCGCTCTATTTTGCCTAGCCAACACCAACTACGAACGAACCCACAGCCGAGCACTACTCCTCTCCCGAGGGATACAAACAGTTTTACCACTGATAGGCTCATGATGACTCCTAGCAAACCTCGCTAATATGGGTCTCCCCCCCTCCCCCAACCTCATGGGGGAGATTACCATTATAACTGCTATATTTAACTGATCAAACTGATCCCTGGTTCTCACAGGCCTGGGCACCCTCCTCACTGCTTGGTACTCCCTATATATATTCCTTATAACACAACGAGGACTAACACCCCAACATCTCACAACCATTTACCCCTCACACACTCGAGAGCACACACTCATCGCCC…
Ao_H20	1	CCTGAAGTTTTTCAGGAGCTATTGTTCTAATAATTGCACATGGACTAATCTCATCCGCTCTATTTTGCCTAGCCAACACCAACTACGAACGAACCCACAGCCGAGCACTACTCCTCTCCCGAGGGATACAAACAGTTTTACCACTGATAGGCTCATGATGACTTCTAGCAAACCTCGCTAATATGGCTCTCCCCCCCTCCCCCAACCTCATGGGGGAGATTACCATTATAACTGCTATATTTAACTGATCAAACTGATCCCTGGTTCTCACAGGCCTGGGCACCCTCCTCACTGCTTGCTACTCCCTATATATATTCCTTATAACACAACGAGGACTAACACCCCAACATCTCACAACCATTTACCCCTCACGCACTCGAGAGCACACACTCATCGCCC…
Ao_H21	2	CCTGAAGTTTTTCAGGGGCTATTGTTCTAATAATTGCACATGGACTAATCTCATCCGCTCTATTTTGCCTAGCCAACACCAACTACGAACGAACCCACAGCCGAGCACTACTCCTCTCCCGAGGGATACAAACAGTATTACCACTGATAGGCTCATGATGACTTCTAGCAAACCTCGCTAATATGGCTCTCCCCCCCTCCCCCAACCTCATGGGGGAGATTACCATTATAACTGCTATATTTAACTGATCAAACTGATCCCTGGTTCTCACAGGCCTGGGCACCCTCCTCACTGCTTGCTACTCCCTATATATATTCCTTATAACACAACGAGGACTAACACCCCAACATCTCACAACCATTTACCCCTCACACACTCGAGAGCACACACTCATCGCCC…
Ao_H22	1	CCTGAAGTTTTTCAGGAGCTATTGTTCTAATAATTGCACATGGACTAATCTCATCCGCTCTATTTTGCCTAGCCAACACCAACTACGAACGAACCCACAGCCGAGCACTACTCCTCTCCCGAGGGATACAAACAGTATTACCACTGATAGGCTCATGATGACTTCTAGCAAACCTCGCTAATATGGCTCTCCCCCCCTCCCCCAACCTCATGGGGGAGATTACCATTATAACTGCTATATTTAACTGATCAGACTGATCCCTGGTTCTCACAGGCCTGGGCACCCTCCTCACTGCTTGCTACTCCCTATATATATTCCTTATAACACAACGAGGAATAACACCCCAACATCTCACAACCATTTACCCCTCACACACTCGAGAGCACACACTCATCGCCC…
Ao_H23	2	CCTGAAGTTTTTCAGGAGCTATTGTTCTAATAATTGCACACGGACTAATCTCATCCGCTCTATTTTGCCTAGCCAACACCAACTACGAACGAACCCACAGCCGAGCACTACTCCTCTCCCGAGGGATACAAACAGTATTACCACTGATAGGCTCATGATGACTTCTAGCAAACCTCGCTAATATGGCTCTCCCCCCCTCCCCCAACCTCATGGGGGAGATTACCATTATAACTGCTATATTTAATTGATCAAACTGATCCCTGGTTCTCACAGGCCTGGGCACCCTCCTCACTGCTTGCTACTCCCTATATATATTCCTTATAACACAACGAGGACTAACACCCCAACATCTCACAACCATTTATCCCTCACACACTCGAGAGCACACACTCATCGCCC…
Ao_H24	1	CCTGAAGTTTTTCAGGAGCTATTGTTCTAATAATTGCACATGGACTAATCTCATCCGCTCTATTTTGCCTAGCCAACACCAACTACGAACGAACCCACAGCCGAGCACTACTCCTCTCCCGAGGGATACAAACAGTATTACCACTGATAGGCTCATGATGACTTCTAGCCAACCTCGCTAATATGGGTCTCCCCCCCTCCCCCAACCTCATGGGGGAGATTACCATTATAACTGCTATATTTAACTGATCAAACTGATCCCTGGTTCTCACAGGCCGGGGCACCCTCCTCACTGCTTGCTACTCCCTATATATATTCCTTATAACACAACGAGGACTAACACCCCAACATCTCACAACCATTTACCCCTCACACACTCGAGAGCACACACTCATCGCCC…
Ao_H25	1	CCTGAAGTTTTTCAGGAGCTATTGTTCTAATAATTGCACATGGACTAATCTCATCCGCTCTATTTTGCCTAGCCAACACCAACTACGAACGAACCCACAGCCGAGCACTACTCCTCTCCCGAGGGATACAAACAGTATTACCACTGATAGGCTCATGATGACTTCTAGCAAACCTCGCTAATATGGGTCTCCCCCCCTCCCCCAACCTCATGGGGGAGATTACCATTATAACTGCTATATTTAACTGATCAAACTGATCCCTGGTTCTCACAGGCCTGGGCACCCTCCTCACTGCTTGCTACTCCCTATATATATTCCTTATAACACAACGAGGACTAACACCCCAACATCTCACAACCATTTACCCCTCACACACTCGAGAGCACACACTCATCGCCC…
Ao_H26	1	CCTGAAGTTTTTCAGGAGCTATTGTTCTAATAATTGCACATGGACTAATCTCATCCGCTCTATTTTGCCTAGCCAACACCAACTACGAACGAACCCACAGCCGAGCACTACTCCTCTCCCGAGGGATACAAACAGTATTACCACTGATAGGCTCATGATGACTTCTAGCAAACCTCGCTAATATGGCTCTCCCCCCCTCCCCCAACCTCATGGGGGAGATTACCATTATAACTGCTATATTTAACTGATCAAACTGATCCCTGGTTCTCACAGGCCTGGGCACCCTCCTCACTGCTTGCTACTCCCTATATATATTCCTTATGACACAACGAGGACTAACACCCCAACATCTCACAACCATTTACCCCTCACACACTCGAGAGCACACACTCATCGCCC…
Ao_H27	1	CCTGAAGTTTTTCAGGAGCTATTGTTCTAATAATTGCACATGGACTAATCTCATCCGCTCTATTTTGCCTAGCCAACACCAACTACGAACGAACCCACAGCCGAGCACTACTCCTCTCCCGAGGGATACAAACAGTTTTACCACTGATAGGCTCATGATGACTTCTATCAAACCTCGCTAATATGGGTCTCCCCCCCTCCCCCAACCTCATGGGGGAGATTACCATTATAACTGCTATATTTAACTGATCAAACTGATCCCTGGTTCTCACAGGCCTGGGCACCCTCCTCACTGCTTGGTACTCCCTATATATATTCCTTATAACACAACGAGGACTAACACCCCAACATCTCACAACCATTTACCCCTCACACACTCGAGAGCACACACTCATCGCCC…
Ao_H28	7	CCTGAAGTTTTTCAGGAGCTATTGTTCTAATAATTGCACATGGACTAATCTCATCCGCTCTATTTTGCCTAGCCAACACCAACTACGAACGAACCCACAGCCGAGCACTACTCCTCTCCCGAGGGATACAAACAGTTTTACCACTGATAGGCTCATGATGACTTCTAGCAAACCTCGCTAATATGGCTCTCCCCCCCTCCCCCAACCTCATGGGGGAGATTACCATTATAACTGCTATATTTAACTGATCAAACTGATCCCTGGTTCTCACAGGCCTGGGCACCCTCCTCACTGCTTGCTACTCCCTATATATATTCCTTATAACACAACGAGGACTAACACCCCAACATCTCACAACCATTTACCCCTCACACACTCGAGAGCACACACTCATCGCCC…
Ao_H29	5	CCTGAAGTTTTTCAGGAGCTATTGTTCTAATAATTGCACATGGACTAATCTCATCCGCTCTATTTTGCCTAGCCAACACCAACTACGAACGAACCCACAGCCGAGCACTACTCCTCTCCCGAGGGATACAAACAGTATTACCACTGATAGGCTCATGATGACTTCTAGCAAACCTCGCTAATATGGCTCTCCCCCCCTCCCCCAACCTCATGGGGGAAATTACCATTATAACTGCTATATTTAACTGATCAAACTGATCCCTGGTTCTCACAGGCCTGGGCACCCTCCTCACTGCTTGCTACTCCCTATATATATTCCTTATAACACAACGAGGAATAACACCCCAACATCTCACAACCATTTACCCCTCACACACTCGAGAGCACACACTCATCGCCC…
Ao_H30	1	CCTGAAGTTTTTCAGGAGCTATTGTTCTAATAATTGCACATGGACTAATCTCATCCGCTCTATTTTGCCTAGCCAACACCAACTACGAACGAACCCACAGCCGAGCACTACTCCTCTCCCGAGGGATACAAACAGTATTACCACTGATAGGCTCATGATGACTTCTAGCAAACCTCGCTAATATGGCTCTCCCCCCCTCCCCCAACCTCATGGGGGAAATTACCATTATAACTGCTATATTTAACTGATCAAACTGATCCCTGGTTCTCACAGGCCTGGGCACCCTCCTCACTGCTTGCTACTCCCTATATATATTCCTTATAACACAACGAGGAATAACACCCCAACATCTCACAACCATTTACCCCTCACACACTCGAGAGCACACACTCATCGCCC…
Ao_H31	1	CCTGAAGTTTTTCAGGAGCTATTGTTCTAATAATTGCACATGGACTAATCTCATCCGCTCTATTTTGCCTAGCCAACACCAACTACGAACGAACCCACAGCCGAGCACTACTCCTCTCCCGAGGGATACAAACAGTATTACCACTGATAGGCTCATGATGACTTCTAGCAAACCTCGCTAATATGGCTCTCCCCCCCTCCCCCAACCTCATGGGGGAAATTACCATTATAACTGCTATATTTAACTGATCAAGCTGATCCCTGGTTCTCACAGGCCTGGGCACCCTCCTCACTGCTTGCTACTCCCTATATATATTCCTTATAACACAACGAGGAATAACACCCCAACATCTCACAACCATTTACCCCTCACACACTCGAGAGCACACACTCATCGCCC…
Ao_H32	3	CCTGAAGTTTTTCAGGAGCTATTGTTCTAATAATTGCACATGGACTAATCTCATCCGCTCTATTTTGCCTAGCCAACACCAACTACGAACGAACCCACAGCCGAGCACTACTCCTCTCCCGAGGGATACAAACAGTATTACCACTGATAGGCTCATGATGACTTCTAGCAAACCTCGCTAATATAGCTCTCCCCCCCTCCCCCAACCTCATGGGGGAGATTACCATTATAACTGCTATATTTAACTGATCAAACTGATCCCTGGTTCTCACAGGCCTGGGCACCCTCCTCACTGCTTGCTACTCCCTATATATATTCCTTATAACACAACGAGGAATAACACCCCAACATCTCACAACCATTTACCCCTCACACACTCGAGAGCACACACTCATCGCCC…
Ao_H33	1	CCTGAAGTTTTTCAGGAGCTATTGTTCTAATAATTGCACATGGACTAATCTCATCCGCTCTATTTTGCCTAGCCAACACCAACTACGAACGAACCCACAGCCGAGCACTACTCCTCTCCCGAGGGATACAAACAGTATTACCACTGATAGGCTCATGATGACTTCTAGCAAACCTCGCTAATATGGCTCTCCCCCCCTCCCCCAACCTCATGGGGGAGATTACCATTATAACTGCTATATTTAACTGATCAAACTGATCCCTGGTTCTCACAGGCCTGGGCACCCTCCTCACTGCTTGCTACTCCCTATATATATTCCTTATAACACAACGAGGACTAACACCCCAACATCTCACAACCATTTACCCCTCACACACTCGAGAGCACACACTCATCGCCC…
Ao_H34	1	CCTGAAGTTTTTCAGGAGCTATTGTTCTAATAATTGCACATGGACTAATCTCATCCGCTCTATTTTGCCTAGCCAACACCAACTACGAACGAACCCACAGCCGAGCACTACTCCTCTCCCGAGGGATACAAACAGTTTTACCACTGATAGGCTCATGATGACTCCTAGCAAACCTCGCTAATATGGCTCTCCCCCCCTCCCCCAACCTCATGGGGGAGATTACCATTATAACTGCTATATTTAACTGATCAAACTGATCCCTGGTTCTCACAGGCCTGGGCACCCTCCTCACTGCTTGCTACTCCCTATATATATTCCTTATAACACAACGAGGACTAACACCCCAACATCTCACAACCATTTACCCCTCACACACTCGAGAGCACACACTCATCGCCC…
Ao_H35	2	CCTGAAGTTTTTCAGGAGCTATTGTTCTAATAATTGCACATGGACTAATCTCATCCGCTCTATTTTGCCTAGCCAACACCAACTACGAACGAACCCACAGCCGAGCACTACTCCTCTCCCGAGGGATACAAACAGTTTTACCACTGATAGGTTCATGATGACTTCTAGCAAACCTCGCTAATATGGCTCTCCCCCCCTCCCCCAACCTCATGGGGGAGATTACCATTATAACTGCTATATTTAACTGATCAAACTGATCCCTGGTTCTCACAGGCCTGGGCACCCTCCTCACTGCTTGCTACTCCCTATATATATTCCTTATAACACAACGAGGACTAACACCCCAACATCTCACAACCATTTACCCCTCACACACTCGAGAGCACACACTCATCGCCC…
Ao_H36	1	CCTGAAGTTTTTCAGGAGCTATTGTTCTAATAATTGCACACGGACTAATCTCATCCGCTCTATTTTGCCTAGCCAACACCAACTACGAACGAACCCACAGCCGAGCACTACTCCTCTCCCGAGGGATACAAACAGTATTACCACTGATAGGCTCATGATGACTTCTAGCAAACCTCGCTAATATGGCTCTCCCCCCCTCCCCCAACCTCATGGGGGAGATTACCATTATAACTGCTATATTTAACTGATCAAACTGATCCCTGGTTCTCACAGGCCTGGGCACCCTCCTCACTGCTTGCTACTCCCTATATATATTCCTTATAACACAACGAGGACTAACACCCCAACATCTCACAACCATTTACCCCTCACACACTCGAGAGCACACACTCATCGCCC…
Ao_H37	1	CCTGAAGTTTTTCAGGAGCTATTGTTCTAATAATTGCACATGGACTAATCTCATCCGCTCTATTTTGCCTAGCCAACACCAACTACGAACGAACCCACAGCCGAGCACTACTCCTCTCCCGGGGGATACAAACAGTATTACCACTGATAGGCTCATGATGACTTCTAGCAAACCTCGCTAATATGGCTCTCCCCCCCTCCCCCAACCTCATGGGGGAGATTACCATTATAACTGCTATATTTAACTGATCAAACTGATCCCTGGTTCTCACAGGCCTGGGCACCCTCCTCACTGCTTGCTACTCCCTATATATATTCCTTATAACACAACGAGGACTAACACCCCAACATCTCACAACCATTTACCCCTCACACACTCGAGAGCACACACTCATCGCCC…
Ao_H38	1	CCTGAAGTTTTTCAGGAGCTATTGTTCTAATAATTGCACATGGACTGATCTCATCCGCTCTATTTTGCCTAGCCAACACCAACTACGAACGAACCCACAGCCGAGCACTACTCCTCTCCCGGGGGATACAAACAGTATTACCACTGATAGGCTCATGATGACTTCTAGCAAACCTCGCTAATATGGCTCTCCCCCCCTCCCCCAACCTCATGGGGGAGATTACCATTATAACTGCTATATTTAACTGATCAAACTGATCCCTGGTTCTCACAGGCCTGGGCACCCTCCTCACTGCTTGCTACTCCCTATATATATTCCTTATAACACAACGAGGACTAACACCCCAACATCTCACAACCATTTACCCCTCACACACTCGAGAGCACACACTCATCGCCC…
Ao_H39	3	CCTGAAGTTTTTCAGGAGCTATTGTTCTAATAATTGCACATGGACTAATCTCATCCGCTCTATTTTGCCTAGCCAACACCAACTACGAACGAACCCACAGCCGAGCACTACTCCTCTCCCGAGGGATACAAACAGTATTACCACTGATAGGCTCATGATGACTTCTAGCAAACCTCGCTAATATGGCTCTCCCCCCCTCCCCCAACCTCATGGGGGAGATTACCATTATAACTGCTATATTTAATTGATCAAACTGATCCCTGGTTCTCACAGGCCTGGGCACCCTCCTCACTGCTTGCTACTCCCTATATATATTCCTTATAACACAACGAGGACTAACACCCCAACATCTCACAACCATTTACCCCTCACACACTCGAGAGCACACACTCATCGCCC…
Ao_H40	3	CCTGAAGTTTTTCAGGAGCTATTATTCTAATAATTGCACATGGACTAATCTCATCCGCTCTATTTTGCCTAGCCAACACCAACTACGAACGAACCCACAGCCGAGCACTACTCCTCTCCCGAGGAATACAAACAGTATTACCACTGATAGGCTCATGATGACTTCTAGCAAACCTCGCTAATATGGCTCTCCCCCCCTCCCCCAACCTCATAGGGGAGATTACCATTATAACTGCTATATTTAACTGATCAAACTGATCCCTGATTCTCACAGGCCTAGGCACCCTCCTCACTGCTTGCTACTCCCTATACATATTCCTTATGACGCAACGAGGACTAACACCCCAACATCTCACAACCATTTACCCCTCACACACTCGAGAGCACACACTCATCGCCC…
Ao_H41	1	CCTGAAGTTTTTCAGGAGCTATTGTTCTAATAATTGCACATGGACTAATCTCATCCGCTCTATTTTGCCTAGCCAACACCAACTACGAACGAACCCACAGCCGAGCACTACTCCTCTCCCGAGGGATACAAACAGTATTACCACTGATAGGCTCATGATGACTTCTAGCAAACCTCGCTAATATGGCTCTCCCCCCCTCTCCCAACCTCATAGGGGAGATTACCATTATAACTGCTATATTTAACTGATCAAACTGATCCCTGATTCTCACAGGCCTAGGCACCCTCCTCACTGCTTGCTACTCCCTATACATATTCCTTATGACGCAACGAGGGCTAACACCCCAACATCTCACAACCATTTACCCCTCACACACTCGAGAGCACACACTCATCGCCC…
Ao_H42	2	CCTGAAGTTTTTCAGGAGCTATTGTTCTAATAATTGCACATGGACTAATCTCATCCGCTCTATTTTGCCTAGCCAACACCAACTACGAACGAACCCACAGCCGAGCACTACTCCTCTCCCGAGGGATACAAACAGTATTACCACTGATAGGCTCATGATGACTTCTAGCAAACCTCGCTAATATGGCTCTCCCCCCCTCTCCCAACCTCATAGGGGAGATTACCATTATAACTGCTATATTTAACTGATCAAACTGATCCCTGATTCTCACAGGCCTAGGCACCCTCCTCACTGCTTGCTACTCCCTATACATATTCCTTATGACGCAACGAGGGCTAACACCCCAACATCTCACAACCATTTACCCCTCACACACTCGAGAGCACACACTCATCGCCC…
Ao_H43	4	CCTGAAGTTTTTCAGGAGCTATTATTCTAATAATTGCACATGGACTAATCTCATCCGCTCTATTTTGCCTAGCCAACACCAACTACGAACGAACCCACAGCCGAGCACTACTCCTCTCCCGAGGGATACAAACAGTATTACCACTGATAGGCTCATGATGACTTCTAGCAAACCTCGCTAATATGGCTCTCCCCCCCTCCCCCAACCTCATAGGGGAGATTACCATTATAACTGCTATATTTAACTGATCAAACTGATCCCTGATTCTCACAGGCCTAGGCACCCTCCTCACTGCTTGCTACTCCCTATACATATTCCTTATGACGCAACGAGGACTAACACCCCAACATCTCACAACCATTTACCCCTCACACACTCGAGAGCACACACTCATCGCCC…
Ao_H44	3	CCTGAAGTTTTTCAGGAGCTATTATTCTAATAATTGCACATGGGCTAATCTCATCCGCTCTATTTTGCCTAGCCAACACCAACTACGAACGAACCCACAGCCGAGCACTACTCCTCTCCCGAGGAATACAAACAGTATTACCACTGATAGGCTCATGATGACTTCTAGCAAACCTCGCTAATATAGCTCTCCCCCCCTCCCCCAACCTCATAGGGGAGATTACCATTATAACTGCTATATTTAACTGATCAAACTGATCCCTGATTCTCACAGGCCTAGGCACCCTCCTCACTGCTTGCTACTCCCTATACATATTCCTTATGACGCAACGAGGACTAACACCCCAACATCTCACAACCATTTACCCCTCACACACTCGAGAGCACACACTCATCGCCC…
Ao_H45	1	CCTGAAGTTTTTCAGGAGCTATTATTCTAATAATTGCACATGGGCTAATCTCATCCGCTCTATTTTGCCTAGCCAACACCAACTACGAACGAACCCACAGCCGAGCACTACTCCTCTCCCGAGGGATACAAACAGTATTACCACTGATAGGCTCATGATGACTTCTAGCAAACCTCGCTAATATGGCTCTCCCCCCCTCCCCCAACCTCATGGGGGAGATTACCATTATAACTGCTATATTTAACTGATCAAACTGATCCCTGATTCTCACAGGCCTAGGCACCCTCCTCACTGCTTGCTACTCCCTATACATATTCCTTATGACGCAACGAGGACTAACACCCCAACATCTCACAACCATTTACCCCTCACACACTCGAGAGCACACACTCATCGCCC…
Ao_H46	2	CCTGAAGTTTTTCAGGAGCTATTATTCTAATAATTGCACATGGGCTAATCTCATCCGCTCTATTTTGCCTAGCCAACACCAACTACGAACGAACCCACAGCCGAGCACTACTCCTCTCCCGAGGAATACAAACAGTGTTACCACTGATAGGCTCATGATGACTTCTAGCAAACCTCGCTAATATAGCTCTCCCCCCCTCCCCCAACCTCATAGGGGAGATTACCATTATAACTGCTATATTTAACTGATCAAACTGATCCCTGATTCTCACAGGCCTAGGCACCCTCCTCACTGCTTGCTACTCCCTATACATATTCCTTATGACGCAACGAGGACTAACACCCCAACATCTCACAACCATTTACCCCTCACACACTCGAGAGCACACACTCATCGCCC…
Ao_H47	1	CCTGAAGTTTTTCAGGAGCTATTGTTCTAATAATTGCACATGGACTAATCTCATCCGCTCTATTTTGCCTAGCCAACACCAACTACGAACGAACCCACAGCCGAGCACTACTCCTCTCCCGAGGGATACAAACAGTATTACCACTGATAGGCTCATGATGACTTCTAGCAAACCTCGCTAATATGGCTCTCCCCCCCTCCCCCAACCTCATAGGGGAGATTACCATTATAACTGCTATATTTAACTGATCAAACTGATCCCTGATTCTCACAGGCCTAGGCACCCTCCTCACTGCCTGCTACTCCCTATACATATTCCTTATAACGCAACGAGGACTAACACCCCAACATCTCACAACCATTTACCCCTCACACACTCGAGAGCACACACTCATCGCCC…
Ao_H48	2	CCTGAAGTTTTTCAGGAGCTATTGTTCTAATAATTGCACATGGACTAATCTCATCCGCTCTATTTTGCCTAGCCAACACCAACTACGAACGAACCCACAGCCGAGCACTACTCCTCTCCCGAGGGATACAAACAGTATTACCACTGATAGGCTCATGATGACTTCTAGCAAACCTCGCTAATATGGCTCTCCCCCCCTCCCCCAACCTCATAGGGGAGATTACCATTATAACTGCTATATTTAACTGATCAAACTGATCCCTGATTCTCACAGGCCTAGGCACCCTCCTCACTGCTTGCTACTCCCTATACATATTCCTTATGACGCAACGAGGACTAACACCCCAACATCTCACAACCATTTACCCCTCACACACTCGAGAGCACACACTCATCGCCC…
Ao_H49	1	CCTGAAGTTTTTCAGGAGCTATTATTCTAATAATTGCACATGGGCTAATCTCATCCGCTCTATTTTGCCTAGCCAACACCAACTACGAACGAACCCACAGCCGAGCACTACTCCTCTCCCGAGGAATACAAACAGTGTTACCACTGATAGGCTCATGATGACTTCTAGCAAACCTCGCTAATATAGCTCTCCCCCCCTCCCCCAACCTCATAGGGGAGATTACCATTATAACTGCTATATTTAACTGATCAAACTGATCCCTGATTCTCACAGGCCTAGGCACCCTCCTCACTGCTTGCTACTCCCTATACATATTCCTTATGACGCAACGAGGACTAACACCCCAACATCTCACAACCATTTACCCCTCACACACTCGAGAGCACACACTCATCGCCC…
Ao_H50	1	CCTGAAGTTTTTCAGGAGCTATTGTTCTAATAATTGCACATGGACTAATCTCATCCGCTCTATTTTGCCTAGCCAACACCAACTACGAACGAACCCACAGCCGAGCACTACTCCTCTCCCGAGGGATACAAACAGTATTACCACTGATAGGCTCATGATGACTTCTAGCAAACCTCGCTAATATGGCTCTCCCCCCCTCCCCCAACCTCATAGGGGAGATTACCATTATAACTGCTATATTTAACTGATCAAACTGATCCCTGATTCTCACAGGCCTAGGCACCCTCCTCACTGCTTGCTACTCCCTATACATATTCCTTATGACGCAACGAGGACTAACACCCCAACATCTCACAACCATTTACCCCTCACACACTCGAGAACACACACTCATCGCCC…
Ao_H51	1	CCTGAAGTTTTTCAGGAGCTATTATTCTAATAATTGCACATGGACTAATCTCATCCGCTCTATTTTGCCTAGCCAACACCAACTACGAACGAACCCACAGCCGAGCACTACTCCTCTCCCGAGGAATACAAACAGTATTACCACTGATAGGCTCATGATGACTTCTAGCAAACCTCGCTAATATGGCTCTCCCCCCCTCCCCCAACCTCATAGGGGAGATTACCATTATAACTGCTATATTTAACTGATCAAACTGATCCCTGATTCTCACAGGCCTAGGCACCCTCCTCACTGCTTGCTACTCCCTATACATATTCCTTATGACGCAACGAGGACTAACACCCCAACATCTCACAACCATTTACCCCTCACACACTCGAGAGCACACACTCATCGCCC…
Ao_H52	1	CCTGAAGTTTTTCAGGAGCTATTGTTCTAATAATTGCACATGGACTAATCTCATCCGCTCTATTTTGCCTAGCCAACACCAACTACGAACGAACCCACAGCCGAGCACTACTCCTCTCCCGAGGAATACAAACAGTATTACCACTGATAGGCTCATGATGACTTCTAGCAAACCTCGCTAATATGGCTCTCCCCCCCTCCCCCAACCTCATAGGGGAGATTACCATTATAACTGCTATATTTAACTGATCAAACTGATCCCTAATTCTCACAGGCCTGGGCACCCTCCTCACTGCTTGCTACTCCCTATACATATTCCTTATGACGCAACGAGGGCTAACACCCCAACATCTCACAACCATTTACCCCTCACACACTCGAGAGCACACACTCATCGCCC…
Ao_H53	1	CCTGAAGTTTTTCAGGAGCTATTGTTCTAATAATTGCTCATGGACTAATCTCATCCGCTCTATTTTGCCTAGCCAACACCAACTACGAACGAACCCACAGCCGAGCACTACTCCTCTCCCGAGGGATACAAACAGTATTACCACTGATAGGCTCGTGATGACTTCTAGCAAACCTCGCTAATATGGCTCTCCCCCCCTCCCCCAACCTCATAGGGGAGATTACCATTATAACTGCTATATTTAACTGATCAAACTGATCCCTGATTCTCACAGGCCTGGGCACCCTTCTCACTGCTTGCTACTCCCTATATATGTTCCTTATGACGCAACGAGGACAAACACCCCAACATCTCACAACCATTTACCCCTCACACACTCGAGAGCACACACTCATCGCCC…
Ao_H54	1	CCTGAAGTTTTTCAGGAGCTATTGTTCTAATAATTGCTCATGGACTAATCTCATCCGCTCTATTTTGCCTAGCCAACACCAACTACGAACGAACCCACACCCGAGCTCTACTCCTCTCCCGAGGGATACAAACAGTATTACCACTGATAGGCTCATGATGACTTCTAGCAAACCTCGCTAATATGGCTCTCCCCCCCTCCCCCAACCTCATAGGGGAGATTACCATTATAACTGCTATATTTAACTGATCAAACTGATCCCTGATTCTCACAGGCCTGGGCACCCTTCTCACTGCTTGCTACTCCCTATATATGTTCCTTATGACCCAACGAGGACAAACACCCCAACATCTCACAACCATTTACCCCTCACACACTCGAGAGCACACACTCATCGCCC…
Ao_H55	1	CCTGAAGTTTTTCAGGAGCTATTGTTCTAATAATTGCTCATGGACTAATCTCATCCGCTCTATTTTGCCTAGCCAACACCAACTACGAACGAACCCACAGCCGAGCACTACTCCTCTCCCGAGGGATACAAACAGTATTACCACTGATAGGCTCATGATGACTTCTAGCAAACCTCGCTAATATGGCTCTCCCCCCCTCCCCCAACCTCATAGGGGAGATTACCATTATAACTGCTATATTTAACTGATCAAACTGATCCCTGATTCTCACAGGCCTGGGCACCCTCCTCACTGCTTGCTACTCCCTATATATGTTCCTTATGACGCAACGAGGAATAACACCCCAACATCTCACAACCATTTACCCCTCACACACTCGAGAGCACACACTCATCGCCC…
Ao_H56	1	CCTGAAGTTTTTCAGGAGCTATTGTTCTAATAATTGCTCACGGACTAATCTCATCCGCTCTATTTTGCCTAGCCAACACCAACTACGAACGAACCCACAGCCGAGCACTACTCCTCTCCCGAGGGATACAAACAGTATTACCACTGATAGGCTCATGATGACTTCTAGCAAACCTCGCTAATATGGCTCTCCCCCCCTCCCCCAACCTCATAGGGGAGATTACCATTATAACTGCTATATTTAACTGATCAAACTGATCCCTGATTCTCACAGGCCTGGGCACCCTCCTCACTGCTTGCTACTCCCTATATATGTTCCTTATGACGCAACGAGGACAAACACCCCAACATCTCACAACCATTTACCCCTCACACACTCGAGAGCACACACTCATAGCCC…
Ao_H57	1	CCTGAAGTTTTTCAGGAGCTATTGTTCTAATAATTGCTCATGGACTAATCTCATCCGCTCTATTTTGCCTAGCCAACACCAACTACGAACGAACCCACAGCCGAGCACTACTCCTCTCCCGAGGGATACAAACAGTATTACCACTGATAGGCTCATGATGACTTCTAGCAAACCTCGCTAATATGGCTCTCCCCCCCTCCCCCAACCTCATAGGGGAGATTACCATTATAACTGCTATATTTAACTGATCAAACTGATCTTTGATTCTCACAGGCCTGGGCACCCTTCTCACTGCTTGCTACTCCCTATATATGTTCCTTATGACGCAACGAGGACAAACACCCCAACATCTCACAACCATTTACCCCTCACACACTCGAGAGCACACACTCATCGCCC…
Ao_H58	1	CCTGAAGTTTTTCAGGAGCTATTGTTCTAATAATTGCTCATGGACTAATCTCATCCGCTCTATTTTGCCTAGCCAACACCAACTACGAACGAACCCACAGCCGAGCACTACTCCTCTCCCGAGGGATACAAACAGTATTACCACTGATAGGCTCGTGATGACTTCTAGCAAACCTCGCTAATATGGCTCTCCCCCCCTCCCCCAACCTCATAGGGGAGATTACCATTATAACTGCTATATTTAACTGATCAAACTGATCCCTGATTCTCACAGGCCTGGGCACCCTTCTCACTGCTTGCTACTCCCTATATATGTTCCTTATGACGCAACGAGGACAAACACCCCAACATCTCACAACCATTTACCCCTCACACACTCGAGAGCACACACTCATCGCCC…
Ao_H59	1	CCTGAAGTTTTTCAGGGGCTATTGTTCTAATAATTGCACATGGACTAGTCTCATCCGCTCTATTCTGCCTAGCTAACACCAACTACGAACGAACATACAGCCGAGCTCTACTCCTCTCCCGAGGAATACAAACAGTATTACCACTGATAGGCTCATGATGACTTCTAGCGAACCTCGCTAATATAGCTCTCCCCCCTTCCCCCAACCTCATAGGGGAAATTACCATCATAACTGCTATATTTAACTGATCAAACTGATCCCTGATCCTCACAGGCCTGGGCACCCTCCTCACTGCTTGCTACTCCCTATATATATTTCTTATAACACAACGAGGATTAACACCCCAACATCTCACAACCATTTACCCCTCACACACCCGAGAACACACACTCATCGCCC…
Ao_H60	1	CCTGAAGTTTTTCAGGGGCTATTGTTCTAATAATTGCACATGGACTAGTCTCATCCGCTCTATTCTGCCTAGCTAACACCAACTACGAACGAACATACAGCCGAGCTCTACTCCTCTCCCGAGGAATACAAACAGTATTACCACTGATAGGCTCATGATGACTTCTAGCGAACCTCGCTAATATAGCTCTCCCCCCTTCCCCCAACCTCATAGGGGAAATTACCATCATAACTGCTATATTTAACTGATCAAACTGATCCCTGATCCTCACAGGCCTGGGCACCCTCCTCACTGCTTGCTACTCCCTATATATATTTCTTATAACACAACGAGGATTAACACCCCAACATCTCACAACCATTTACCCCTCACACACCCGAGAACACACACTCATCGCCC…
Ao_H61	1	CCTGAAGTTTTTCAGGGGCTATTGTTCTAATAATTGCACATGGACTAGTCTCATCCGCTCTATTCTGCCTAGCTAACACCAACTACGAACGAACATACAGCCGAGCTCTACTCCTCTCCCGAGGAATACAAACAGTATTACCACTGATAGGCTCATGATGACTTCTAGCGAACCTCGCTAATATAGCTCTCCCCCCTTCCCCCAACCTCATAGGGGAAATTACCATCATAACTGCTATATTTAACTGATCAAACTGATCCCTGATCCTCACAGGCCTGGGCACCCTCCTCACTGCTTGGTACTCCCTATATATATTTCTTATAACACAACGAGGATTAACACCCCAACATCTCACAACCATTTACCCCTCACACACCCGAGAACACACACTCATCGCCC…
Ao_H62	1	CCTGAAGTTTTTCAGGGGCTATTGTTCTAATAATTGCACATGGACTAGTCTCATCCGCTCTATTCTGCCTAGCTAACACCAACTACGAACGAACATACAGCCGAGCTCTACTCCTCTCCCGAGGAATACAAACAGTATTACCACTGATAGGCTCATGATGACTTCTAGCGAACCTCGCTAATATAGCTCTCCCCCCTTCCCCCAACCTCATAGGGGAAATTACCATCATAACTGCTATATTTAACTGATCAAACTGATCCCTGATCCTCACAGGCCTGGGCACCCTCCTCACTGCTTGGTACTCCCTATATATATTTCTTATAACACAACGAGGATTAACACCCCAACATCTCACAACCATTTACCCCTCACACACCCGAGAACACACACTCATCGCCC…
Ao_H63	1	CCTGAAGTTTTTCAGGGGCTATTGCTCTAATAATTGCACATGGACTAGTCTCATCCGCTCTATTCTGCCTAGCTAACACCAACTACGAACGAACATACAGCCGAGCTCTACTCCTCTCCCGAGGAATACAAACAGTATTACCACTGATAGGCTCATGATGACTTCTAGCGAACCTCGCTAATATAGCTCTCCCCCCTTCCCCCAACCTCATAGGAGAAATTACCATCATAACTGCTATATTTAACTGATCAAACTGATCCCTGATCCTCACAGGCCTGGGCACCCTCCTCACTGCTTGCTACTCCCTATATATATTTCTTATAACACAACGAGGTTTAACACCCCAACATCTCACAACCATTTACCCCTCACACACCCGAGAACACACACTCATCGCCC…
Ao_H64	1	CCTGAAGTTTTTCAGGGGCTATTGTTCTAATAATTGCACATGGACTAGTCTCATCCGCTCTATTCTGCCTAGCTAACACCAACTACGAACGAACATACAGCCGAGCTCTACTCCTCTCCCGAGGAATACAAACAGTATTACCACTGATAGGCTCATGATGACTTCTAGCGAACCTCGCTAATATAGCTCTCCCCCCTTCCCCCAACCTCATAGGGGAAATTACCATCATAACTGCTATATTTAACTGATCAAACTGATCCCTGATCCTCACAGGCCTGGGCACCCTCCTCACTGCTTGCTACTCCCTATATATATTTCTTATAACACAACGAGGATTAACACCCCAACATCTCACAACCATTTACCCCTCACACACCCGAGAACACACACTCATCGCCC…
Ao_H65	1	CCTGAAGTTTTTCAGGGGCTATTGTTCTAATAATTGCACATGGACTAGTCTCATCCGCTCTATTCTGCCTAGCTAACACCAACTACGAACGAACATACAGCCGAGCTCTACTCCTCTCCCGAGGAATACAAACAGTATTACCACTGATAGGCTCATGATGACTTCTAGCGAACCTCGCTAATATAGCTCTCCCCCCTTCCCCCAACCTCATAGGGGAAATTACCATCATAACTGCTATATTTAACTGATCAAACTGATCCCTGATCCTCACAGGCCTGGGCACCCTCCTCACTGCTTGCTACTCCCTATATATATTTCTTATAACACAACGAGGATTAACACCCCAACATCTCACAACCATTTACCCCTCACACACCCGAGAACACACACTCATCGCCC…
Ao_H66	4	CCTGAAGTTTTTCAGGAGCTATTGTTCTAATAATTGCACATGGACTAATCTCATCCGCTCTATTTTGCCTAGCCAATACCAACTACGAACGAACCCACAGCCGAGCATTACTCCTCTCCCGAGGAATACAAACAGTACTACCACTGATAGGCTCATGATGACTTCTGGCAAACCTCGCTAATATAGCTCTCCCCCCCTCCCCCAACCTCATAGGGGAGATTACCATTATAACTGCCATATTTAACTGATCAAACTGATCCCTGATTCTCACAGGCCTGGGCACTCTCCTCACTGCTTGCTACTCCCTATATATATTCCTTATGACACAACGAGGACTAACACCCCAGCATCTCACAACCATTTACCCCTCACACACCCGAGAGCACACACTCATCGCCC…
Ao_H67	5	CCTGAAGTTTTTCAGGAGCTATTGTTCTAATAATTGCACATGGACTAATCTCATCCGCTCTATTTTGCCTAGCCAATACCAACTACGAACGAACCCACAGCCGAGCATTACTCCTCTCCCGAGGAATACAAACAGTACTACCACTGATAGGCTCATGATGACTTCTGGCAAACCTCGCTAATATAGCTCTCCCCCCTTCCCCCAACCTCATAGGGGAGATTACCATTATAACTGCCATATTTAACTGATCAAACTGATCCCTGATTCTCACAGGCCTGGGCACTCTCCTCACTGCTTGCTACTCCCTATATATATTCCTTATGACACAACGAGGACTAACACCCCAGCATCTCACAACCATTTACCCCTCACACACCCGAGAGCACACACTCATCGCCC…
Ao_H68	17	CCTGAAGTTTTTCAGGAGCTATTGTTCTAATAATTGCACATGGACTAATCTCATCCGCTCTATTTTGCCTAGCCAATACCAACTACGAACGAACCCACAGCCGAGCATTACTCCTCTCCCGAGGAATACAAACAGTACTACCACTGATAGGCTCATGATGACTTCTGGCAAACCTCGCTAATATAGCTCTCCCCCCTTCCCCCAACCTCATAGGGGAGATTACCATTATAACTGCCATATTTAACTGATCAAACTGATCCCTGATTCTCACAGGCCTGGGCACTCTCCTCACTGCTTGCTACTCCCTATATATATTCCTTATGACACAACGAGGACTAACACCCCAGCATCTCACAACCATTTACCCCTCACACACCCGAGAGCACACACTCATCGCCC…
Ao_H69	1	CCTGAAGTTTTTCAGGAGCTATTGTTCTAATAATTGCACATGGACTAATCTCATCCGCTCTATTTTGCCTAGCCAATACCAACTACGAACGAACCCACAGCCGAGCATTACTCCTCTCCCGAGGAATACAAACAGTACTACCACTGATAGGCTCATGATGACTTCTGGCAAACCTCGCTAATATAGCTCTCCCCCCTTCCCCCAACCTCATAGGGGAGATTACCATTATAACTGCCATATTTAACTGATCAAACTGATCCCTGATTCTCACAGGCCTGGGCACTCTCCTCACTGCTTGCTACTCCCTATATATATTCCTTATGACACAACGAGGACTAACACCCCAACATCTCACAACCATTTACCCCTCACACACCCGAGAGCACACACTCATCGCCC…
Ao_H70	9	CCTGAAGTTTTTCAGGAGCTATAGTTCTAATAATTGCACATGGACTAATCTCATCCGCTCTATTTTGCCTAGCCAACACCAACTACGAACGAACCCACAGCCGAGCACTACTCCTCTCCCGAGGGATACAAACAGTATTACCACTGATAGGCTCATGATGACTTCTAGCAAACCTCGCTAATATGGCTCTCCCCCCCTCCCCCAACCTCATAGGGGAGATTACCATTATAACTGCTATATTTAACTGATCAAACTGATCCCTAATTCTCACAGGCCTGGGCACCCTCCTCACTGCTTGCTACTCCCTATACATATTCCTTATGACGCAACGAGGGCTAACACCCCAACATCTCACAACCATTTACCCCTCACACACTCGAGAGCACACACTCATCGCCC…
Ao_H71	4	CCTGAAGTTTTTCAGGAGCTATTGTTCTAATAATTGCACATGGACTAATCTCATCCGCTCTATTTTGCCTAGCCAACACCAACTACGAACGAACCCACAGCCGGGCACTACTCCTCTCCCGAGGGATACAAACAGTATTACCACTGATAGGCTCATGATGACTTCTAGCAAACCTCGCTAATATGGCTCTCCCCCCCTCCCCCAACCTCATAGGGGAGATTACCATTATAACTGCTATATTTAACTGATCAAACTGATCCCTAATTCTCACAGGCCTGGGCACCCTCCTCACTGCTTGCTACTCCCTATACATATTCCTTATGACGCAACGAGGGCTAACACCCCAACATCTCACAACCATTTACCCCTCACACACTCGAGAGCACACACTCATCGCCC…
Ao_H72	1	CCTGAAGTTTTTCAGGAGCTATTGTTGTAATAATTGCACATGGACTAATCTCATCCGCTCTATTTTGCCTAGCCAACACCAACTACGAACGAACCCACAGCCGAGCACTACTCCTCTCCCGAGGGATACAAACAGTATTACCACTGATAGGCTCATGATGACTTCTAGCAAACCTCGCTAATATGGCTCTCCCCCCCTCCCCCAACCTCATAGGGGAGATTACCATTATAACTGCTATATTTAACTGATCAAACTGATCCCTAATTCTCACAGGCCTGGGCACCCTCCTCACTGCTTGCTACTCCCTATACATATTCCTTATGACGCAACGAGGGCTAACACCCCAACATCTCACAACCATTTACCCCTCACACACTCGAGAGCACACACTCATCGCCC…
Ao_H73	2	CCTGAAGTTTTTCAGGAGCTATTGTTCTAATAATTGCACATGGGCTAATCTCATCCGCTCTATTTTGCCTAGCCAACACCAACTACGAACGAACCCACAGCCGAGCACTACTCCTCTCCCGAGGGATACAAACAGTATTACCACTGATAGGCTCATGATGACTTCTAGCAAACCTCGCTAATATGGCTCTCCCCCCCTCCCCCAACCTCATAGGGGAGATTACCATTATAACTGCTATATTTAACTGATCAAACTGATCCCTAATTCTCACAGGCCTGGGCACCCTCCTCACTGCTTGCTACTCCCTATACATATTCCTTATGACGCAACGAGGGCTAACACCCCAACATCTCACAACCATTTACCCCTCACACACTCGAGAGCACACACTCATCGCCC…
Ao_H74	2	CCTGAAGTTTTTCAGGAGCTATTGTTCTAATAATTGCACATGGACTAATCTCATCCGCTCTATTTTGCCTAGCCAACACCAACTACGAACGAACCCACAGCCGAGCACTACTCCTCTCCCGAGGGATACAAACAGTATTACCACTGATAGGCTCATGATGACTTCTAGCAAACCTCGCTAATATGGCTCTCCCCCCCTCCCCCAACCTCATAGGGGAGATTACCATTATAACTGCTATATTTAACTGATCAAACTGATCCCTAATTCTCACAGGCCTAGGCACCCTCCTCACTGCTTGCTACTCCCTATACATATTCCTTATGACGCAACGAGGGCTAACACCCCAACATCTCACAACCATTTACCCCTCACACACTCGAGAGCACACACTCATCGCCC…
GenBank Accession for the samples taken from Gonçalves et al. (2015)
Sample name*	GenBank Accession
ALB1	KT363136
ALB2	KT363137
ALI1	KT363119
ALI2	KT363120
BEN1	KT363277
BER10	KT363283
BER11	KT363284
BER12	KT363285
BER13	KT363286
BER16	KT363287
BER18	KT363288
BER19	KT363289
BER2	KT363278
BER20	KT363290
BER21	KT363291
BER22	KT363292
BER23	KT363293
BER5	KT363279
BER7	KT363280
BER8	KT363281
BER9	KT363282
BR03	EF441305
BR13	EF441306
CAC1	KT363135
CAS1	KT363140
CAS2	KT363141
CAT10	EF441307
CAT12	EF441308
COR1	KT363242
COR2	KT363221
DO02	EF441291
EST26	KT363266
EST27	KT363267
FCO2	KT363269
FRAN10	KT363227
FRAN14	KJ858965
FRAN2	KT363225
FRAN3	KT363226
GAT2	KT363260
GER1	KT363246
GER2	KT363247
GLJ1	KT363126
GLJ2	KT363127
GLJ3	KT363128
GUA1	KT363121
GUA2	KT363122
HG076	EF441301
HG120	EF441298
HG123	EF441299
HS16	EF441304
HUE2	KT363274
IMS1460	KT363270
IMS1461	KT363271
IMS1851	KT363148
IMS1852	KT363149
IMS1901	KT363150
IMS1902	KT363151
IMS1932	KT363152
IMS1933	KT363153
IMS2006	KT363154
IMS2007	KT363155
IMS2021	KT363156
IMS2022	KT363157
IMS2071	KT363158
IMS2072	KT363159
IMS2091	KT363160
IMS2092	KT363161
IMS2126	KT363162
IMS2127	KT363163
IMS2247	KT363164
IMS2248	KT363165
IMS2267	KT363166
IMS2268	KT363167
IMS2288	KT363168
IMS2289	KT363169
IMS2299	KT363170
IMS2300	KT363171
IMS2314	KT363172
IMS2315	KT363173
IMS2317	KT363174
IMS2318	KT363175
IMS2337	KT363176
IMS2338	KT363177
IMS2367	KT363178
IMS2368	KT363179
IMS2387	KT363180
IMS2388	KT363294
IMS2407	KT363295
IMS2408	KT363296
IMS2427	KT363297
IMS2428	KT363298
IMS2447	KT363299
IMS2448	KT363300
IMS2467	KT363301
IMS2468	KT363302
IMS2492	KT363303
IMS2493	KT363304
IMS2501	KT363275
IMS2502	KT363276
IMS2522	KT363181
IMS2538	KT363182
IMS2571	KT363183
IMS2572	KT363184
IMS2620	KT363185
IMS2621	KT363186
IMS2630	KT363229
IMS2631	KT363230
IMS2633	KT363187
IMS2634	KT363188
IMS2641	KT363189
IMS2642	KT363190
IMS2643	KT363191
IMS2644	KT363192
IMS2645	KT363193
IMS2646	KT363194
IMS2665	KT363195
IMS2666	KT363196
IMS2669	KT363197
IMS2670	KT363198
IMS2749	KT363199
IMS2750	KT363200
IMS2928	KT363272
IMS3009	KT363231
IMS3010	KT363232
IMS3022	KT363201
IMS3244	KT363202
IMS3245	KT363203
IMS3507	KT363204
IMS3621	KT363233
IMS3624	KT363254
IMS3625	KT363255
IMS3626	KT363256
IMS3627	KT363257
IMS3628	KT363258
IMS3640	KT363273
IMS3866	KT363205
IMS3959	KT363238
IMS4055	KT363206
IMS4096	KT363239
IMS4107	KT363306
IMS4301	KT363207
IMS4302	KT363208
IMS4358	KT363209
IMS4359	KT363210
JUB3	EF441292
LEO1	KT363222
LEO2	KT363223
LEO3	KT363224
LOU2	KT363252
LOU6	KT363253
LUG1	KT363240
LUG2	KT363241
MAD1	KT363123
MAD2	KT363124
MAD3	KT363125
MAL4	KT363264
MAL5	KT363265
MAN1	KT363263
MGP115	EF441294
MIR1	KT363145
MNCN:DNA:4334	KT363305
MNCN:DNA:4445	KT363234
MNCN:DNA:4785	KT363235
MNCN:DNA:4786	KT363236
MNCN:DNA:8444	KT363237
MNCN:DNA:8590	KT363259
MOG5	KT363146
MOG6	KT363147
MON1	KT363142
MON12	KT363143
MON15	KT363144
MTM01	EF441302
MTM05	KJ858966
MTM2	KT363261
MUR1	KT363250
NA37	EF441293
OLV1	KT363132
OUR03	EF441295
OUR2	KT363245
OVI1	KT363218
PAM1	KT363228
PO01	EF441296
RIB1	KT363220
SAN1	KT363211
SAN2	KT363212
SAN3	KT363213
SAN4	KT363214
SMA25	EF441303
SMA26	KT363268
SOR1	KT363131
TIN1	KT363219
TOL1	KT363133
TOL2	KT363134
TUD1	KT363129
TUD2	KT363215
TUD3	KT363216
TUD4	KT363217
VAL22	EF441300
VAL24	KT363251
VER1	KT363243
VER2	KT363244
VLC1	KT363138
VLC2	KT363139
VOU11	KT363262
VPA13	KT363249
VPA9	KT363248
ZA04	EF441297
ZAM1	KT363130
* Sample names correspond to the table above
GenBank Accessions newly identified haplotypes:
Ao_H70	OP320913
Ao_H71	OP320914
Ao_H72	OP320915
Ao_H73	OP320916
Ao_H74	OP320917
